# Supplementary material for: Transgenic Mice Overexpressing the Divalent Metal Transporter 1 Exhibit Iron Accumulation and Enhanced Parkin Expression in the Brain
Source: Springer Nature journal article supplement (doi:10.1007/s12017-017-8451-0), 2017-07-10
Supplement: MOESM1 [file 13292116]

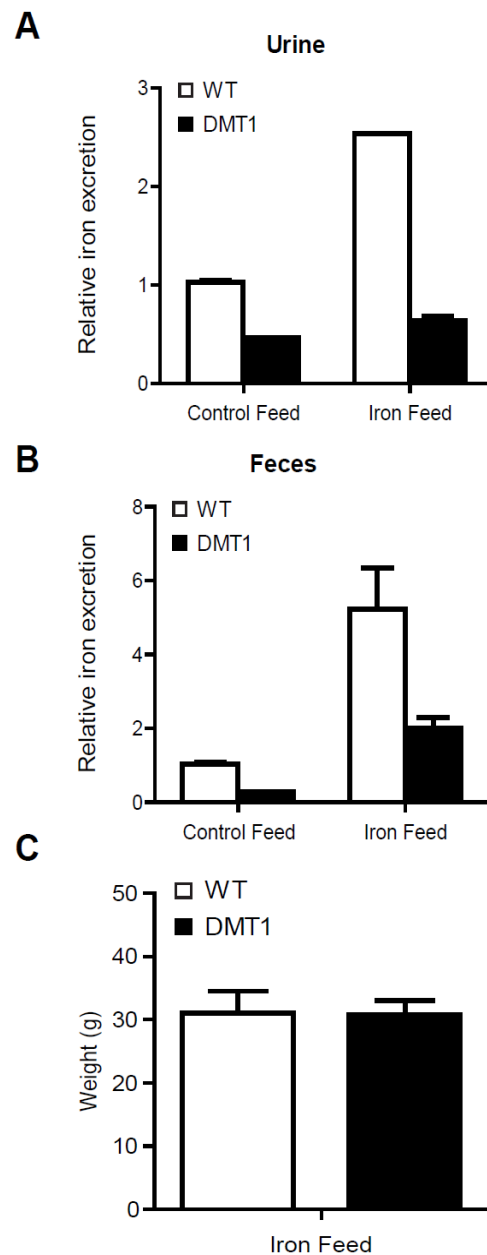

**Figure S1. Iron excretion in the urine and feces WT and DMT1 mice.** (A) Bar graph showing relative iron excretion in urine from WT (Control=2, Iron=2) and DMT1 mice (Control=2, Iron=4) aged for 9 months and then given an iron-enriched diet for another 9 months. (B) Bar graph showing relative iron excretion in feces from WT (Control=2, Iron=2) and DMT1 mice (Control=2, Iron=4). (C) Weights of 18 month old WT (n=5) and DMT1 (n=7) mice. All data was represented as mean  $\pm$  S.E.M.

Supplemental Information (Zhang et al)

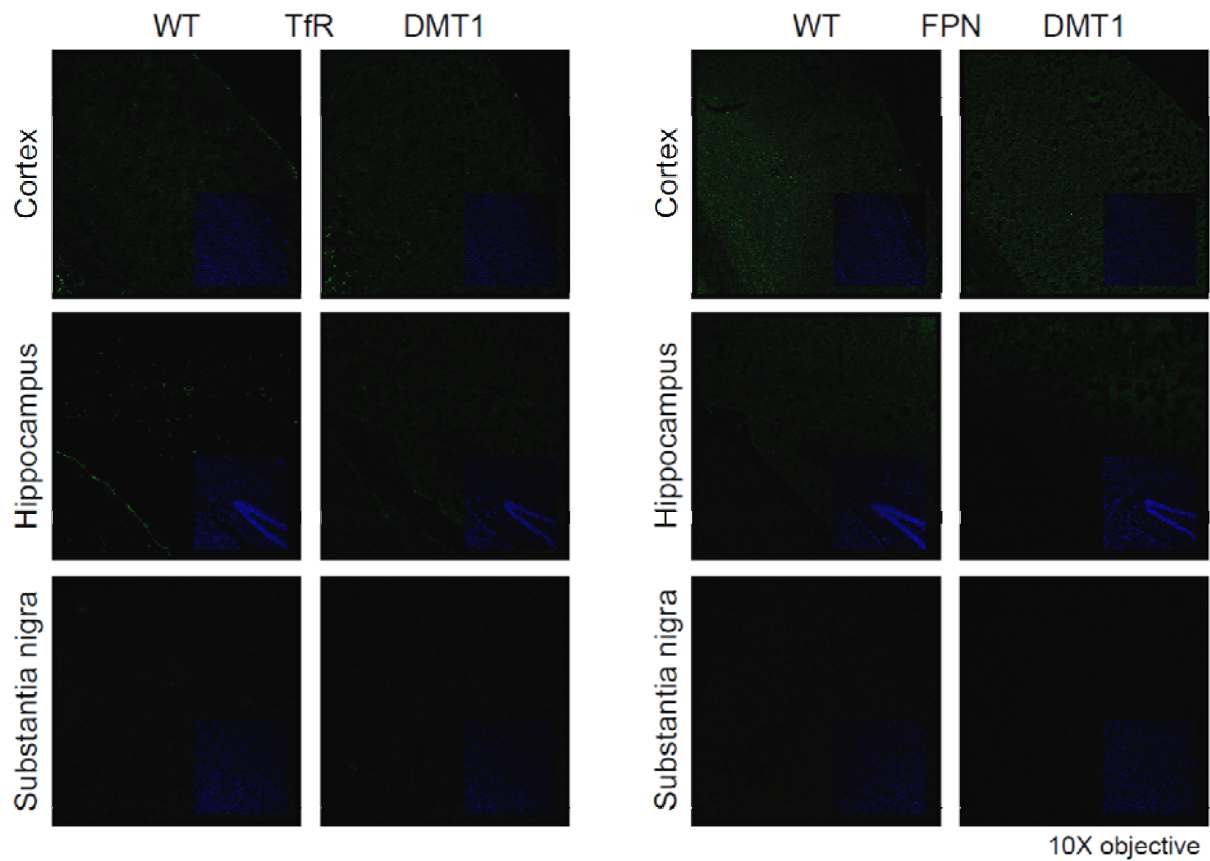

**Figure S2. Transferrin receptor (TFRC) and ferroportin (FPN) levels in WT and DMT1 mice given iron supplemented feed.** Green immunofluorescence staining of TFRC and FPN in the cortex, hippocampus and substantia nigra of mice aged for 9 months and then given an iron-enriched diet for another 9 months. (Insets) Corresponding blue nuclear staining with Hoechst 33342.

Supplemental Information (Zhang et al)

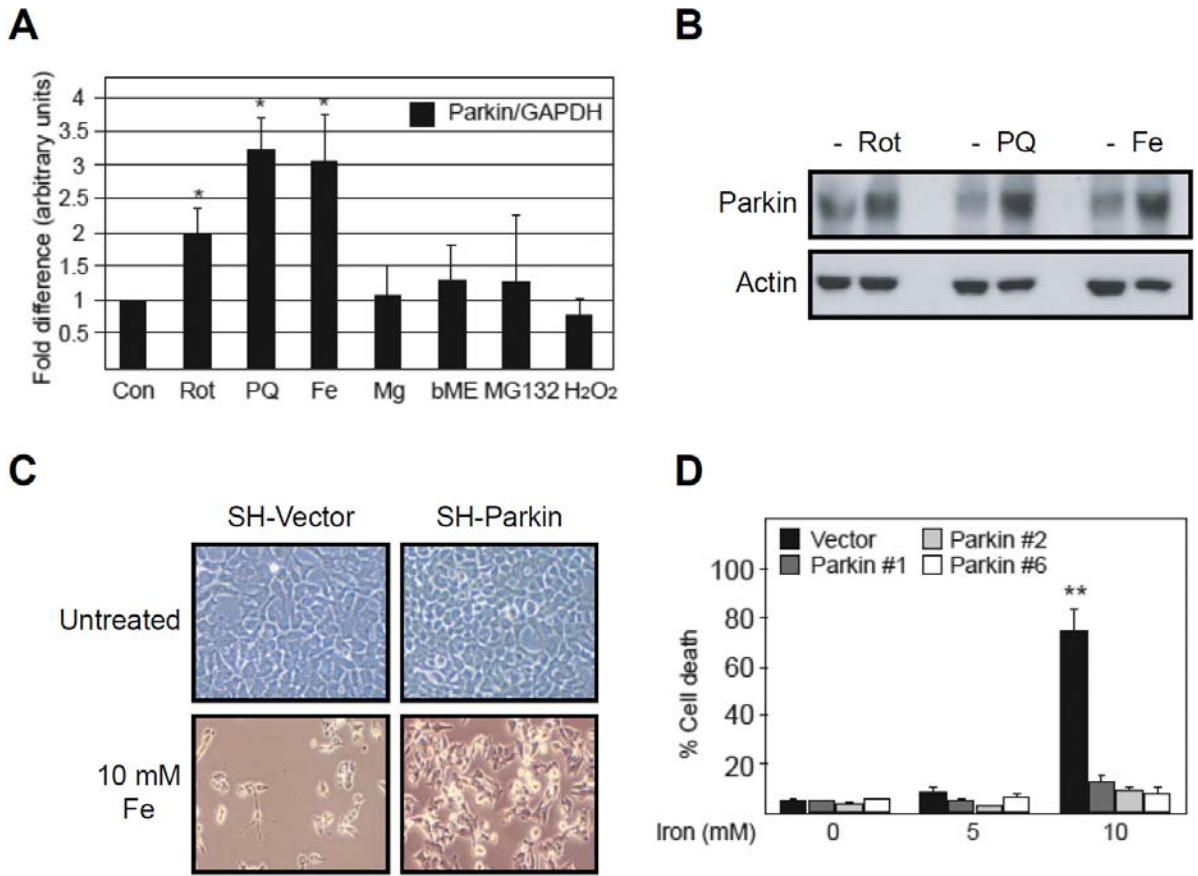

**Figure S3. Parkin overexpression protects SH-SY5Y cells from iron-induced toxicity.** (A) Bar graph showing the regulation of Parkin mRNA levels in SH-SY5Y cells in response to rotenone (Rot), paraquat (PQ), iron (Fe), manganese (Mn),  $\beta$ -mercaptoethanol (bME), MG132 and H<sub>2</sub>O<sub>2</sub> treatments. Data represented as mean  $\pm$  S.E.M. \* $p$  < 0.05,  $n=3$ , Student's  $t$ -test. (B) Representative western blot of Parkin protein expression in SH-SY5Y cells in the absence or presence of rotenone, paraquat or iron. (C) Representative phase contrast images of empty vector or Parkin SH-SY5Y stable cell lines with or without 10 mM Fe treatment. (D) Bar graph of percentage of cell death for empty vector or Parkin-transfected SH-SY5Y cells treated with increasing concentrations of iron. Data represented as mean  $\pm$  S.E.M. \*\* $p$  < 0.01,  $n=3$ , Student's  $t$ -test.
